# Supplementary material for: Clinical Performance of the Consensus Immunoscore in Colon Cancer in the Asian Population from the Multicenter International SITC Study
Source: MDPI journal article supplement (doi:10.3390/cancers14184346), 2022-09-06
Supplement: s1 [file s1]

Table S1: Demographic distribution

|                                                                    | Cohort1<br>STAGE I-III<br>(N=423) | SITC Cohort<br>STAGE I-III<br>(N=2681) | Pvalue<br>Fisher's<br>exact test |
|--------------------------------------------------------------------|-----------------------------------|----------------------------------------|----------------------------------|
| <b>Age at surgery</b>                                              |                                   |                                        |                                  |
| N                                                                  | 423 (100%)                        | 2681 (100%)                            |                                  |
| Mean (SD)                                                          | 64.7 (12.1)                       | 67.6 (12.5)                            |                                  |
| Range                                                              | (22-88)                           | (22-88)                                |                                  |
| <b>Center</b>                                                      |                                   |                                        |                                  |
| AHM (India)                                                        | 58 (13.7%)                        | -                                      |                                  |
| SAP (Japan)                                                        | 136 (32.2%)                       | -                                      |                                  |
| TOK (Japan)                                                        | 194 (45.9%)                       | -                                      |                                  |
| XIA (China)                                                        | 35 (8.3%)                         | -                                      |                                  |
| <b>Gender</b>                                                      |                                   |                                        | 0,2494                           |
| Male                                                               | 231 (54.6%)                       | 1380 (51.5%)                           |                                  |
| Female                                                             | 192 (45.4%)                       | 1301 (48.5%)                           |                                  |
| <b>Age grouped</b>                                                 |                                   |                                        | 0,0005                           |
| <65                                                                | 200 (47.3%)                       | 1024 (38.2%)                           |                                  |
| >=65                                                               | 223 (52.7%)                       | 1657 (61.8%)                           |                                  |
| <b>T Stage</b>                                                     |                                   |                                        | 0,6214                           |
| T1                                                                 | 20 (4.7%)                         | 122 (4.6%)                             |                                  |
| T2                                                                 | 53 (12.5%)                        | 402 (15.0%)                            |                                  |
| T3                                                                 | 289 (68.3%)                       | 1776 (66.2%)                           |                                  |
| T4                                                                 | 61 (14.4%)                        | 381 (14.2%)                            |                                  |
| <b>N Stage</b>                                                     |                                   |                                        | 0,1666                           |
| N0                                                                 | 318 (75.2%)                       | 1885 (70.3%)                           |                                  |
| N1                                                                 | 66 (15.6%)                        | 513 (19.1%)                            |                                  |
| N2                                                                 | 39 (9.2%)                         | 250 (9.3%)                             |                                  |
| Not Available                                                      | 0 (0.0%)                          | 33 (1.2%)                              |                                  |
| <b>Number of Lymph Nodes Examined All AJCC/UICC-TNM Stages</b>     |                                   |                                        |                                  |
| N                                                                  | 423 (100%)                        | 2657 (99.3%)                           |                                  |
| Mean (SD)                                                          | 16.3 (9.9)                        | 16.8 (13.9)                            |                                  |
| Range                                                              | (1-68)                            | (1-145)                                |                                  |
| Not Available                                                      | 0 (0.0%)                          | 19 (0.7%)                              |                                  |
| <b>Number of Lymph Nodes Examined AJCC/UICC-TNM Stage II only</b>  |                                   |                                        |                                  |
| N                                                                  | 251 (100%)                        | 1430 (99.7%)                           |                                  |
| Mean (SD)                                                          | 65.3 (11.1)                       | 20.1 (14.4)                            |                                  |
| Range                                                              | (32-88)                           | (1-145)                                |                                  |
| Not Available                                                      | 0 (0.0%)                          | 4 (0.3%)                               |                                  |
| <b>Number of Positive Lymph Nodes AJCC/UICC-TNM Stage III only</b> |                                   |                                        |                                  |
| N                                                                  | 105 (100%)                        | 763 (100%)                             |                                  |
| Mean (SD)                                                          | 3.4 (3.5)                         | 18.6 (14.3)                            |                                  |
| Range                                                              | (1-27)                            | (1-117)                                |                                  |
| <b>M Stage TNM8</b>                                                |                                   |                                        |                                  |
| M0                                                                 | 423 (100%)                        | 2681 (100%)                            |                                  |
| <b>AJCC/UICC-TNM Stage</b>                                         |                                   |                                        | 0,1301                           |
| I                                                                  | 67 (15.8%)                        | 451 (16.8%)                            |                                  |
| II                                                                 | 251 (59.3%)                       | 1434 (53.5%)                           |                                  |
| III                                                                | 105 (24.8%)                       | 763 (28.5%)                            |                                  |
| Not Available                                                      | 0 (0.0%)                          | 33 (1.2%)                              |                                  |
| <b>Differentiation Grade</b>                                       |                                   |                                        | 0,0024                           |
| Well                                                               | 118 (27.9%)                       | 601 (22.4%)                            |                                  |
| Moderate                                                           | 261 (61.7%)                       | 1299 (48.5%)                           |                                  |
| Poor                                                               | 39 (9.2%)                         | 322 (12.0%)                            |                                  |
| Not Available                                                      | 5 (1.2%)                          | 459 (17.1%)                            |                                  |
| <b>Proximal vs. Distal Primary (Tumor)</b>                         |                                   |                                        | 0,0233                           |
| Proximal                                                           | 184 (43.5%)                       | 1340 (50.0%)                           |                                  |
| Distal                                                             | 232 (54.8%)                       | 1322 (49.3%)                           |                                  |
| Not Available                                                      | 7 (1.7%)                          | 19 (0.7%)                              |                                  |
| <b>VELIPI</b>                                                      |                                   |                                        | 1,0000                           |
| No                                                                 | 122 (28.8%)                       | 367 (45.7%)                            |                                  |
| Yes                                                                | 301 (71.2%)                       | 902 (33.6%)                            |                                  |
| Not Available                                                      | 0 (0.0%)                          | 556 (20.7%)                            |                                  |
| <b>Mucinous colloid type</b>                                       |                                   |                                        | <.0001                           |
| No                                                                 | 367 (86.8%)                       | 1962 (73.2%)                           |                                  |
| Yes                                                                | 18 (4.3%)                         | 366 (13.7%)                            |                                  |
| Not Available                                                      | 38 (9%)                           | 353 (13.2%)                            |                                  |
| <b>MSI Status (Derived)</b>                                        |                                   |                                        | <.0001                           |
| pMMR                                                               | 246 (58.2%)                       | 1275 (47.6%)                           |                                  |
| dMMR                                                               | 26 (6.1%)                         | 304 (11.3%)                            |                                  |
| Not Available                                                      | 151 (35.7%)                       | 1102 (41.1%)                           |                                  |
| <b>Post-Operative Chemotherapy</b>                                 |                                   |                                        | <.0001                           |
| No                                                                 | 146 (34.5%)                       | 1856 (70%)                             |                                  |
| Yes                                                                | 265 (62.7%)                       | 742 (28%)                              |                                  |
| Not Available                                                      | 12 (2.8%)                         | 53 (2%)                                |                                  |

MSI: deficient Mismatch repair (dMMR), MSS: proficient Mismatch repair (pMMR).

Table S2: STAGE I-III Bivariable analysis for Clinical Parameters for OS and DFS

| Overall Survival (OS)     |                        |                  |                  |                   |                  |                 |           |                  |                  |                   |                 | Disease-free survival (DFS) |           |  |  |  |  |  |  |  |  |  |  |
|---------------------------|------------------------|------------------|------------------|-------------------|------------------|-----------------|-----------|------------------|------------------|-------------------|-----------------|-----------------------------|-----------|--|--|--|--|--|--|--|--|--|--|
|                           | Number of patients (%) | Rate at          |                  | Unadjusted        |                  | RMST            | P value** | Rate at          |                  | Unadjusted        |                 | RMST                        | P value** |  |  |  |  |  |  |  |  |  |  |
|                           |                        | 3 yr % (95% CI)  | 5 yr % (95% CI)  | HR (95% CI)       | P value*         |                 |           | 3 yr % (95% CI)  | 5 yr % (95% CI)  | HR (95% CI)       | P value*        |                             |           |  |  |  |  |  |  |  |  |  |  |
| Age at surgery (5 groups) |                        |                  |                  |                   |                  |                 |           |                  |                  |                   |                 |                             |           |  |  |  |  |  |  |  |  |  |  |
| <60                       | 134 (31.7)             | 87 (81.3-93.2)   | 84.3 (78.1-91.1) | 1.0 (reference)   | 0.56 (0.49-0.64) | 0.0 (reference) |           | 82 (75.3-89.3)   | 79.9 (72.8-87.6) | 1.0 (reference)   | 0.54 (0.48-0.6) | 0.0 (reference)             |           |  |  |  |  |  |  |  |  |  |  |
| >=60-70                   | 134 (31.7)             | 93.2 (89.1-97.6) | 88.6 (83.3-94.2) | 0.73 (0.38-1.39)  | 0.3329           | 3.5 (-2.2-9.2)  | 0.2320    | 83.5 (77.3-90.2) | 80.2 (73.5-87.4) | 0.97 (0.56-1.67)  | 0.9015          | 1.2 (-4.8-7.4)              | 0.7623    |  |  |  |  |  |  |  |  |  |  |
| >=70-85                   | 149 (35.2)             | 93.9 (90.1-97.8) | 91.8 (87.5-96.4) | 0.81 (0.44-1.5)   | 0.5116           | 4.5 (-0.9-9.9)  | 0.0995    | 85.4 (79.9-91.4) | 84 (78.2-90.2)   | 0.93 (0.55-1.6)   | 0.8009          | 3.2 (-14.0-3)               | 0.3852    |  |  |  |  |  |  |  |  |  |  |
| >85                       | 6 (1.4)                | 66.7 (37.9-100)  | 50 (22.5-100)    | 4.76 (1.62-13.96) | 0.0045           | -18 (-40.1-4)   | 0.1092    | 66.7 (37.9-100)  | 50 (22.5-100)    | 3.58 (1.24-10.34) | 0.0182          | -17 (-43.1-9.2)             | 0.2033    |  |  |  |  |  |  |  |  |  |  |
| 0.53 (0.46-0.59)          |                        |                  |                  |                   |                  |                 |           |                  |                  |                   |                 |                             |           |  |  |  |  |  |  |  |  |  |  |
| 0.0 (reference)           |                        |                  |                  |                   |                  |                 |           |                  |                  |                   |                 |                             |           |  |  |  |  |  |  |  |  |  |  |
| 2.4 (-10.2-14.9)          |                        |                  |                  |                   |                  |                 |           |                  |                  |                   |                 |                             |           |  |  |  |  |  |  |  |  |  |  |
| 0.7113                    |                        |                  |                  |                   |                  |                 |           |                  |                  |                   |                 |                             |           |  |  |  |  |  |  |  |  |  |  |
| 83.4 (78.5-88.6)          |                        |                  |                  |                   |                  |                 |           |                  |                  |                   |                 |                             |           |  |  |  |  |  |  |  |  |  |  |
| 80.8 (75.6-86.4)          |                        |                  |                  |                   |                  |                 |           |                  |                  |                   |                 |                             |           |  |  |  |  |  |  |  |  |  |  |
| 1.0 (reference)           |                        |                  |                  |                   |                  |                 |           |                  |                  |                   |                 |                             |           |  |  |  |  |  |  |  |  |  |  |
| 0.93 (0.6-1.42)           |                        |                  |                  |                   |                  |                 |           |                  |                  |                   |                 |                             |           |  |  |  |  |  |  |  |  |  |  |
| 0.7252                    |                        |                  |                  |                   |                  |                 |           |                  |                  |                   |                 |                             |           |  |  |  |  |  |  |  |  |  |  |
| 0.51 (0.45-0.56)          |                        |                  |                  |                   |                  |                 |           |                  |                  |                   |                 |                             |           |  |  |  |  |  |  |  |  |  |  |
| 0.0 (reference)           |                        |                  |                  |                   |                  |                 |           |                  |                  |                   |                 |                             |           |  |  |  |  |  |  |  |  |  |  |
| 1 (-14-16)                |                        |                  |                  |                   |                  |                 |           |                  |                  |                   |                 |                             |           |  |  |  |  |  |  |  |  |  |  |
| 0.8988                    |                        |                  |                  |                   |                  |                 |           |                  |                  |                   |                 |                             |           |  |  |  |  |  |  |  |  |  |  |
| 0.62 (0.57-0.67)          |                        |                  |                  |                   |                  |                 |           |                  |                  |                   |                 |                             |           |  |  |  |  |  |  |  |  |  |  |
| 0.0 (reference)           |                        |                  |                  |                   |                  |                 |           |                  |                  |                   |                 |                             |           |  |  |  |  |  |  |  |  |  |  |
| -9.7 (-25.6-6.1)          |                        |                  |                  |                   |                  |                 |           |                  |                  |                   |                 |                             |           |  |  |  |  |  |  |  |  |  |  |
| 0.2297                    |                        |                  |                  |                   |                  |                 |           |                  |                  |                   |                 |                             |           |  |  |  |  |  |  |  |  |  |  |
| -19.3 (-31.7-6.9)         |                        |                  |                  |                   |                  |                 |           |                  |                  |                   |                 |                             |           |  |  |  |  |  |  |  |  |  |  |
| 0.0023                    |                        |                  |                  |                   |                  |                 |           |                  |                  |                   |                 |                             |           |  |  |  |  |  |  |  |  |  |  |
| -40.4 (-58.3-21.6)        |                        |                  |                  |                   |                  |                 |           |                  |                  |                   |                 |                             |           |  |  |  |  |  |  |  |  |  |  |
| <.0001                    |                        |                  |                  |                   |                  |                 |           |                  |                  |                   |                 |                             |           |  |  |  |  |  |  |  |  |  |  |
| 0.66 (0.61-0.72)          |                        |                  |                  |                   |                  |                 |           |                  |                  |                   |                 |                             |           |  |  |  |  |  |  |  |  |  |  |
| 0.0 (reference)           |                        |                  |                  |                   |                  |                 |           |                  |                  |                   |                 |                             |           |  |  |  |  |  |  |  |  |  |  |
| -14.5 (-28.5-0.4)         |                        |                  |                  |                   |                  |                 |           |                  |                  |                   |                 |                             |           |  |  |  |  |  |  |  |  |  |  |
| 0.0437                    |                        |                  |                  |                   |                  |                 |           |                  |                  |                   |                 |                             |           |  |  |  |  |  |  |  |  |  |  |
| -66.1 (-84.2-48)          |                        |                  |                  |                   |                  |                 |           |                  |                  |                   |                 |                             |           |  |  |  |  |  |  |  |  |  |  |
| <.0001                    |                        |                  |                  |                   |                  |                 |           |                  |                  |                   |                 |                             |           |  |  |  |  |  |  |  |  |  |  |
| 0.68 (0.63-0.73)          |                        |                  |                  |                   |                  |                 |           |                  |                  |                   |                 |                             |           |  |  |  |  |  |  |  |  |  |  |
| 0.0 (reference)           |                        |                  |                  |                   |                  |                 |           |                  |                  |                   |                 |                             |           |  |  |  |  |  |  |  |  |  |  |
| -10.6 (-22.4-1.3)         |                        |                  |                  |                   |                  |                 |           |                  |                  |                   |                 |                             |           |  |  |  |  |  |  |  |  |  |  |
| 0.0797                    |                        |                  |                  |                   |                  |                 |           |                  |                  |                   |                 |                             |           |  |  |  |  |  |  |  |  |  |  |
| -46.2 (-63.2-29.2)        |                        |                  |                  |                   |                  |                 |           |                  |                  |                   |                 |                             |           |  |  |  |  |  |  |  |  |  |  |
| <.0001                    |                        |                  |                  |                   |                  |                 |           |                  |                  |                   |                 |                             |           |  |  |  |  |  |  |  |  |  |  |
| 0.62 (0.55-0.69)          |                        |                  |                  |                   |                  |                 |           |                  |                  |                   |                 |                             |           |  |  |  |  |  |  |  |  |  |  |
| 0.0 (reference)           |                        |                  |                  |                   |                  |                 |           |                  |                  |                   |                 |                             |           |  |  |  |  |  |  |  |  |  |  |
| -16.1 (-28.1-4.1)         |                        |                  |                  |                   |                  |                 |           |                  |                  |                   |                 |                             |           |  |  |  |  |  |  |  |  |  |  |
| 0.0084                    |                        |                  |                  |                   |                  |                 |           |                  |                  |                   |                 |                             |           |  |  |  |  |  |  |  |  |  |  |
| -44.4 (-70.1-18.8)        |                        |                  |                  |                   |                  |                 |           |                  |                  |                   |                 |                             |           |  |  |  |  |  |  |  |  |  |  |
| 0.0007                    |                        |                  |                  |                   |                  |                 |           |                  |                  |                   |                 |                             |           |  |  |  |  |  |  |  |  |  |  |
| 0.51 (0.45-0.56)          |                        |                  |                  |                   |                  |                 |           |                  |                  |                   |                 |                             |           |  |  |  |  |  |  |  |  |  |  |
| 0.0 (reference)           |                        |                  |                  |                   |                  |                 |           |                  |                  |                   |                 |                             |           |  |  |  |  |  |  |  |  |  |  |
| 1.4 (-13.9-16.7)          |                        |                  |                  |                   |                  |                 |           |                  |                  |                   |                 |                             |           |  |  |  |  |  |  |  |  |  |  |
| 0.8587                    |                        |                  |                  |                   |                  |                 |           |                  |                  |                   |                 |                             |           |  |  |  |  |  |  |  |  |  |  |
| 0.52 (0.48-0.57)          |                        |                  |                  |                   |                  |                 |           |                  |                  |                   |                 |                             |           |  |  |  |  |  |  |  |  |  |  |
| 0.0 (reference)           |                        |                  |                  |                   |                  |                 |           |                  |                  |                   |                 |                             |           |  |  |  |  |  |  |  |  |  |  |
| -5.7 (-24.4-13)           |                        |                  |                  |                   |                  |                 |           |                  |                  |                   |                 |                             |           |  |  |  |  |  |  |  |  |  |  |
| 0.5487                    |                        |                  |                  |                   |                  |                 |           |                  |                  |                   |                 |                             |           |  |  |  |  |  |  |  |  |  |  |
| 0.51 (0.48-0.54)          |                        |                  |                  |                   |                  |                 |           |                  |                  |                   |                 |                             |           |  |  |  |  |  |  |  |  |  |  |
| 0.0 (reference)           |                        |                  |                  |                   |                  |                 |           |                  |                  |                   |                 |                             |           |  |  |  |  |  |  |  |  |  |  |
| -7.7 (-39.7-24.2)         |                        |                  |                  |                   |                  |                 |           |                  |                  |                   |                 |                             |           |  |  |  |  |  |  |  |  |  |  |
| 0.6352                    |                        |                  |                  |                   |                  |                 |           |                  |                  |                   |                 |                             |           |  |  |  |  |  |  |  |  |  |  |
| 0.52 (0.48-0.55)          |                        |                  |                  |                   |                  |                 |           |                  |                  |                   |                 |                             |           |  |  |  |  |  |  |  |  |  |  |
| 0.0 (reference)           |                        |                  |                  |                   |                  |                 |           |                  |                  |                   |                 |                             |           |  |  |  |  |  |  |  |  |  |  |
| 1.3 (-18.4-21)            |                        |                  |                  |                   |                  |                 |           |                  |                  |                   |                 |                             |           |  |  |  |  |  |  |  |  |  |  |
| 0.8974                    |                        |                  |                  |                   |                  |                 |           |                  |                  |                   |                 |                             |           |  |  |  |  |  |  |  |  |  |  |
| 0.57 (0.51-0.63)          |                        |                  |                  |                   |                  |                 |           |                  |                  |                   |                 |                             |           |  |  |  |  |  |  |  |  |  |  |
| 0.0 (reference)           |                        |                  |                  |                   |                  |                 |           |                  |                  |                   |                 |                             |           |  |  |  |  |  |  |  |  |  |  |
| -17.4 (-32.3-2.4)         |                        |                  |                  |                   |                  |                 |           |                  |                  |                   |                 |                             |           |  |  |  |  |  |  |  |  |  |  |
| 0.0225                    |                        |                  |                  |                   |                  |                 |           |                  |                  |                   |                 |                             |           |  |  |  |  |  |  |  |  |  |  |
| 0.55 (0.5-0.61)           |                        |                  |                  |                   |                  |                 |           |                  |                  |                   |                 |                             |           |  |  |  |  |  |  |  |  |  |  |
| 1.47 (0.96-2.25)          |                        |                  |                  |                   |                  |                 |           |                  |                  |                   |                 |                             |           |  |  |  |  |  |  |  |  |  |  |
| 0.0776                    |                        |                  |                  |                   |                  |                 |           |                  |                  |                   |                 |                             |           |  |  |  |  |  |  |  |  |  |  |
| 0.58 (0.53-0.63)          |                        |                  |                  |                   |                  |                 |           |                  |                  |                   |                 |                             |           |  |  |  |  |  |  |  |  |  |  |
| -34.4 (-50.3-18.6)        |                        |                  |                  |                   |                  |                 |           |                  |                  |                   |                 |                             |           |  |  |  |  |  |  |  |  |  |  |
| <.0001                    |                        |                  |                  |                   |                  |                 |           |                  |                  |                   |                 |                             |           |  |  |  |  |  |  |  |  |  |  |
| -30 (-45.2-14.7)          |                        |                  |                  |                   |                  |                 |           |                  |                  |                   |                 |                             |           |  |  |  |  |  |  |  |  |  |  |
| 0.0001                    |                        |                  |                  |                   |                  |                 |           |                  |                  |                   |                 |                             |           |  |  |  |  |  |  |  |  |  |  |
| 0.0 (reference)           |                        |                  |                  |                   |                  |                 |           |                  |                  |                   |                 |                             |           |  |  |  |  |  |  |  |  |  |  |
| 0.0 (reference)           |                        |                  |                  |                   |                  |                 |           |                  |                  |                   |                 |                             |           |  |  |  |  |  |  |  |  |  |  |
| -3.4 (-7.0-2)             |                        |                  |                  |                   |                  |                 |           |                  |                  |                   |                 |                             |           |  |  |  |  |  |  |  |  |  |  |
| 0.0659                    |                        |                  |                  |                   |                  |                 |           |                  |                  |                   |                 |                             |           |  |  |  |  |  |  |  |  |  |  |
| 0.0 (reference)           |                        |                  |                  |                   |                  |                 |           |                  |                  |                   |                 |                             |           |  |  |  |  |  |  |  |  |  |  |
| 0.56 (0.5-0.62)           |                        |                  |                  |                   |                  |                 |           |                  |                  |                   |                 |                             |           |  |  |  |  |  |  |  |  |  |  |
| -21.2 (-53.6-11.3)        |                        |                  |                  |                   |                  |                 |           |                  |                  |                   |                 |                             |           |  |  |  |  |  |  |  |  |  |  |
| 0.2009                    |                        |                  |                  |                   |                  |                 |           |                  |                  |                   |                 |                             |           |  |  |  |  |  |  |  |  |  |  |
| -6.8 (-16-2.4)            |                        |                  |                  |                   |                  |                 |           |                  |                  |                   |                 |                             |           |  |  |  |  |  |  |  |  |  |  |
| 0.1485                    |                        |                  |                  |                   |                  |                 |           |                  |                  |                   |                 |                             |           |  |  |  |  |  |  |  |  |  |  |
| 5.5 (-13.6-24.7)          |                        |                  |                  |                   |                  |                 |           |                  |                  |                   |                 |                             |           |  |  |  |  |  |  |  |  |  |  |
| 0.0 (reference)           |                        |                  |                  |                   |                  |                 |           |                  |                  |                   |                 |                             |           |  |  |  |  |  |  |  |  |  |  |
| 0.0 (reference)           |                        |                  |                  |                   |                  |                 |           |                  |                  |                   |                 |                             |           |  |  |  |  |  |  |  |  |  |  |

\* Wald P Value. \*\* Restricted Mean Survival Time (RMST) P value. MSS: proficient Mismatch repair (pMMR)

Table S3: STAGE I-III MSS and STAGE II Bivariable analysis for IS Parameters for TTR, OS and DFS

|                                                 | Number of patients (%) | Time To Recurrence (TTR)                                       |                  |                  |                     |                  |                           | Overall survival (OS) |                  |                  |                   |                     |                  | Disease-free survival (DFS) |           |                  |                  |                    |                     |                  |                           |           |  |  |
|-------------------------------------------------|------------------------|----------------------------------------------------------------|------------------|------------------|---------------------|------------------|---------------------------|-----------------------|------------------|------------------|-------------------|---------------------|------------------|-----------------------------|-----------|------------------|------------------|--------------------|---------------------|------------------|---------------------------|-----------|--|--|
|                                                 |                        | Rate at                                                        |                  | HR (95% CI)      | Unadjusted P value* | C-index (95% CI) | RMST Rel. Months (95% CI) | P value**             | Rate at          |                  | HR (95% CI)       | Unadjusted P value* | C-index (95% CI) | RMST Rel. Months (95% CI)   | P value** | Rate at          |                  | HR (95% CI)        | Unadjusted P value* | C-index (95% CI) | RMST Rel. Months (95% CI) | P value** |  |  |
|                                                 |                        | 3 yr % (95% CI)                                                | 5 yr % (95% CI)  |                  |                     |                  |                           |                       | 3 yr % (95% CI)  | 5 yr % (95% CI)  |                   |                     |                  |                             |           | 3 yr % (95% CI)  | 5 yr % (95% CI)  |                    |                     |                  |                           |           |  |  |
| STAGE I-III MSS                                 |                        |                                                                |                  |                  |                     |                  |                           |                       |                  |                  |                   |                     |                  |                             |           |                  |                  |                    |                     |                  |                           |           |  |  |
| Immunoscore Lo vs Int+Hi                        |                        | 94 (38.2)<br>152 (61.8)                                        | 73.4 (65-82.9)   | 71.2 (62.7-81)   | 4.58 (2.27-9.23)    | <.0001           | 0.68 (0.61-0.75)          |                       | 87.2 (80.7-94.2) | 80.9 (73.3-89.2) | 5.3 (2.25-12.49)  | 0.0001              | 0.64 (0.57-0.72) |                             |           | 73.4 (65-82.9)   | 71.2 (62.7-81)   | 3.69 (1.94-7.02)   | <.0001              | 0.67 (0.6-0.74)  | -36.4 (-56.3-16.4)        | 0.0004    |  |  |
| Lo (0-25%)                                      |                        |                                                                | 94.1 (90.4-97.9) | 92.8 (88.7-97)   | 1.0 (reference)     |                  |                           |                       | 99.3 (96.1-100)  | 98 (95.8-100)    | 1.0 (reference)   |                     |                  |                             |           | 94.1 (90.4-97.9) | 92.8 (88.7-97)   | 1.0 (reference)    |                     |                  | 0.0 (reference)           |           |  |  |
| Int+Hi (25-100%)                                |                        |                                                                |                  |                  |                     |                  |                           |                       |                  |                  |                   |                     |                  |                             |           |                  |                  |                    |                     |                  |                           |           |  |  |
| Immunoscore Lo vs Int vs Hi                     |                        | 94 (38.2)<br>120 (48.8)<br>32 (13)                             | 73.4 (65-82.9)   | 71.2 (62.7-81)   | 10.93 (1.49-80.49)  | 0.0188           | 0.7 (0.63-0.76)           |                       | 87.2 (80.7-94.2) | 80.9 (73.3-89.2) | 7.67 (1.03-57.09) | 0.0466              | 0.72 (0.64-0.8)  |                             |           | 73.4 (65-82.9)   | 71.2 (62.7-81)   | 11.1 (1.51-81.6)   | 0.0181              | 0.68 (0.62-0.75) | -45.8 (-63.1-28.6)        | <.0001    |  |  |
| Lo (0-25%)                                      |                        |                                                                | 92.5 (87.9-97.3) | 91.7 (86.9-96.7) | 2.77 (0.36-21.67)   | 0.3307           |                           |                       | 99.2 (97.6-100)  | 98.3 (96.1-100)  | 1.56 (0.19-12.98) | 0.6794              |                  |                             |           | 92.5 (87.9-97.3) | 91.7 (86.9-96.7) | 3.55 (0.46-27.14)  | 0.2222              |                  | -15.3 (-28.3-2.3)         | 0.0207    |  |  |
| Int (25-70%)                                    |                        |                                                                |                  |                  |                     |                  |                           |                       |                  |                  |                   |                     |                  |                             |           |                  |                  |                    |                     |                  |                           |           |  |  |
| Hi (70-100%)                                    |                        |                                                                | 96.9 (91-100)    | 96.9 (91-100)    | 1.0 (reference)     |                  |                           |                       | 96.9 (91-100)    | 96.9 (91-100)    | 1.0 (reference)   |                     |                  |                             |           | 96.9 (91-100)    | 96.9 (91-100)    | 1.0 (reference)    |                     |                  | 0.0 (reference)           |           |  |  |
| Immunoscore                                     |                        | 39 (15.9)<br>11 (10-25%)<br>120 (48.8)<br>31 (12.6)<br>1 (0.4) | 69.2 (56.2-85.3) | 66.6 (53.3-83.2) | 12.85 (1.68-98.28)  | 0.0139           | 0.71 (0.63-0.78)          |                       | 84.6 (74.96-7)   | 76.9 (64.8-91.4) | 8.69 (1.11-67.98) | 0.0394              | 0.73 (0.64-0.82) |                             |           | 69.2 (56.2-85.3) | 66.6 (53.3-83.2) | 12.47 (1.63-95.42) | 0.0151              | 0.69 (0.62-0.77) | -19.9 (-29-10.7)          | <.0001    |  |  |
| Lo (0-10%)                                      |                        |                                                                | 76.4 (65.9-88.5) | 74.5 (63.9-87)   | 9.11 (1.2-69.3)     | 0.0328           |                           |                       | 89.1 (81.2-97.7) | 83.6 (74.4-94)   | 6.57 (0.85-50.92) | 0.0716              |                  |                             |           | 76.4 (65.9-88.5) | 74.5 (63.9-87)   | 9.61 (1.27-72.81)  | 0.0284              |                  | -14.8 (-21.7-7.9)         | <.0001    |  |  |
| I1 (10-25%)                                     |                        |                                                                | 92.5 (87.9-97.3) | 91.7 (86.9-96.7) | 2.69 (0.34-20.99)   | 0.3460           |                           |                       | 99.2 (97.6-100)  | 98.3 (96.1-100)  | 1.51 (0.18-12.58) | 0.7012              |                  |                             |           | 92.5 (87.9-97.3) | 91.7 (86.9-96.7) | 3.44 (0.45-26.31)  | 0.2337              |                  | -4.9 (-7.7-2)             | 0.0007    |  |  |
| I2 (25-70%)                                     |                        |                                                                | 96.8 (90.8-100)  | 96.8 (90.8-100)  | 1.0 (reference)     |                  |                           |                       | 96.8 (90.8-100)  | 96.8 (90.8-100)  | 1.0 (reference)   |                     |                  |                             |           | 96.8 (90.8-100)  | 96.8 (90.8-100)  | 1.0 (reference)    |                     |                  | -0.6 (-1.8-0.6)           | 0.3094    |  |  |
| I3 (70-95%)                                     |                        |                                                                | 100 (100-100)    | 100 (100-100)    | Inf (0-Inf)         | NA               |                           |                       | 100 (100-100)    | 100 (100-100)    | Inf (0-Inf)       | NA                  |                  |                             |           | 100 (100-100)    | 100 (100-100)    | Inf (0-Inf)        | NA                  |                  | 0.0 (reference)           |           |  |  |
| I4 (95-100%)                                    |                        |                                                                |                  |                  |                     |                  |                           |                       |                  |                  |                   |                     |                  |                             |           |                  |                  |                    |                     |                  |                           |           |  |  |
| STAGE I-III MSI-H                               |                        |                                                                |                  |                  |                     |                  |                           |                       |                  |                  |                   |                     |                  |                             |           |                  |                  |                    |                     |                  |                           |           |  |  |
| Immunoscore Lo vs Int+Hi                        |                        | 5 (19.2)<br>21 (80.8)                                          | 100 (100-100)    | 100 (100-100)    | NA (NA-NA)          | 0.4848           | 0.6 (0.52-0.68)           |                       | 10.3 (-3.3-24)   | 0.1372           | 0 (0-Inf)         | 0.2633              | 0.61 (0.52-0.71) |                             |           | 100 (100-100)    | 100 (100-100)    | 0 (0-Inf)          | 0.2633              | 0.61 (0.52-0.71) | 18.5 (2.4-34.6)           | 0.0245    |  |  |
| Lo (0-25%)                                      |                        |                                                                | 90.5 (78.8-100)  | 90.5 (78.8-100)  | 1.0 (reference)     |                  |                           |                       | 90.5 (78.8-100)  | 90.5 (78.8-100)  | 1.0 (reference)   |                     |                  |                             |           | 90.5 (78.8-100)  | 90.5 (78.8-100)  | 1.0 (reference)    |                     |                  | 0.0 (reference)           |           |  |  |
| Int+Hi (25-100%)                                |                        |                                                                |                  |                  |                     |                  |                           |                       |                  |                  |                   |                     |                  |                             |           |                  |                  |                    |                     |                  |                           |           |  |  |
| STAGE II                                        |                        |                                                                |                  |                  |                     |                  |                           |                       |                  |                  |                   |                     |                  |                             |           |                  |                  |                    |                     |                  |                           |           |  |  |
| Immunoscore Lo vs Int+Hi                        |                        | 102 (40.6)<br>149 (59.4)                                       | 80.4 (72.9-88.7) | 78.3 (70.4-86.9) | 2.72 (1.35-5.51)    | 0.0052           | 0.62 (0.54-0.7)           |                       | 91.1 (85.7-96.8) | 86 (79.5-93.1)   | 1.67 (0.79-3.5)   | 0.1784              | 0.57 (0.48-0.67) |                             |           | 80.4 (72.9-88.7) | 78.3 (70.4-86.9) | 1.46 (0.74-2.88)   | 0.2711              | 0.59 (0.52-0.67) | -21 (-40.4-1.6)           | 0.0342    |  |  |
| Lo (0-25%)                                      |                        |                                                                | 92.7 (88.4-97.2) | 91.1 (86.4-96.1) | 1.0 (reference)     |                  |                           |                       | 95.2 (91.8-98.7) | 94.5 (90.8-98.3) | 1.0 (reference)   |                     |                  |                             |           | 92.1 (87.7-96.7) | 90.5 (85.7-95.6) | 1.0 (reference)    |                     |                  | 0.0 (reference)           |           |  |  |
| Int+Hi (25-100%)                                |                        |                                                                |                  |                  |                     |                  |                           |                       |                  |                  |                   |                     |                  |                             |           |                  |                  |                    |                     |                  |                           |           |  |  |
| Immunoscore Lo vs Int vs Hi                     |                        | 102 (40.6)<br>112 (44.6)<br>37 (14.7)                          | 80.4 (72.9-88.7) | 78.3 (70.4-86.9) | 3.82 (0.9-16.24)    | 0.0697           | 0.63 (0.55-0.71)          |                       | 91.1 (85.7-96.8) | 86 (79.5-93.1)   | 2.67 (0.61-11.67) | 0.1926              | 0.58 (0.49-0.68) |                             |           | 80.4 (72.9-88.7) | 78.3 (70.4-86.9) | 4.02 (0.95-17.04)  | 0.0594              | 0.61 (0.53-0.68) | -30.6 (-50.2-11)          | 0.0022    |  |  |
| Lo (0-25%)                                      |                        |                                                                | 91.5 (86.3-97)   | 90.5 (85-96.3)   | 1.52 (0.33-6.95)    | 0.5867           |                           |                       | 94.5 (90.4-98.9) | 94.5 (90.4-98.9) | 1.8 (0.4-8.11)    | 0.4454              |                  |                             |           | 90.7 (85.3-96.4) | 89.7 (84.1-95.6) | 2.25 (0.51-9.84)   | 0.2813              |                  | -14.7 (-32.2-9.9)         | 0.1009    |  |  |
| Int (25-70%)                                    |                        |                                                                | 96.9 (91-100)    | 93.5 (85.2-100)  | 1.0 (reference)     |                  |                           |                       | 97.2 (92-100)    | 94.3 (86.9-100)  | 1.0 (reference)   |                     |                  |                             |           | 96.9 (91-100)    | 93.5 (85.2-100)  | 1.0 (reference)    |                     |                  | 0.0 (reference)           |           |  |  |
| Hi (70-100%)                                    |                        |                                                                |                  |                  |                     |                  |                           |                       |                  |                  |                   |                     |                  |                             |           |                  |                  |                    |                     |                  |                           |           |  |  |
| Immunoscore                                     |                        | 47 (18.7)<br>55 (21.9)<br>112 (44.6)<br>34 (13.5)<br>3 (1.2)   | 78.2 (67.1-91.1) | 75.8 (64.3-89.4) | 3.89 (0.86-17.57)   | 0.0771           | 0.63 (0.55-0.72)          |                       | 89.4 (81-96.8)   | 82.8 (72.6-94.4) | 2.93 (0.62-13.81) | 0.1738              | 0.6 (0.49-0.7)   |                             |           | 78.2 (67.1-91.1) | 75.8 (64.3-89.4) | 3.82 (0.87-17.69)  | 0.0756              | 0.61 (0.53-0.69) | -13.7 (-20.9-6.4)         | 0.0002    |  |  |
| Lo (0-10%)                                      |                        |                                                                | 82.5 (72.7-93.9) | 80.4 (70.3-92.1) | 3.45 (0.76-15.56)   | 0.1074           |                           |                       | 92.6 (85.9-99.9) | 88.9 (80.9-97.7) | 2.12 (0.44-10.23) | 0.3475              |                  |                             |           | 82.5 (72.7-93.9) | 80.4 (70.3-92.1) | 3.81 (0.85-17.01)  | 0.0801              |                  | -11.8 (-18.4-5.2)         | 0.0005    |  |  |
| I1 (10-25%)                                     |                        |                                                                | 91.5 (86.3-97)   | 90.5 (85-96.3)   | 1.46 (0.32-6.66)    | 0.6256           |                           |                       | 94.5 (90.4-98.9) | 94.5 (90.4-98.9) | 1.68 (0.37-7.57)  | 0.5006              |                  |                             |           | 90.7 (85.3-96.4) | 89.7 (84.1-95.6) | 2.16 (0.49-9.46)   | 0.3054              |                  | -6.4 (-10-2.9)            | 0.0004    |  |  |
| I2 (25-70%)                                     |                        |                                                                | 96.7 (90.5-100)  | 93.2 (84.6-100)  | 1.0 (reference)     |                  |                           |                       | 97 (91.3-100)    | 93.8 (85.9-100)  | 1.0 (reference)   |                     |                  |                             |           | 96.7 (90.5-100)  | 93.2 (84.6-100)  | 1.0 (reference)    |                     |                  | -3 (-7.5-1.6)             | 0.2050    |  |  |
| I3 (70-95%)                                     |                        |                                                                | 100 (100-100)    | 100 (100-100)    | Inf (0-Inf)         | NA               |                           |                       | 100 (100-100)    | 100 (100-100)    | Inf (0-Inf)       | NA                  |                  |                             |           | 100 (100-100)    | 100 (100-100)    | Inf (0-Inf)        | NA                  |                  | 0.0 (reference)           |           |  |  |
| I4 (95-100%)                                    |                        |                                                                |                  |                  |                     |                  |                           |                       |                  |                  |                   |                     |                  |                             |           |                  |                  |                    |                     |                  |                           |           |  |  |
| STAGE-II Very High Risk (T4 and VELIPi+) and IS |                        | 11 (4.4)<br>16 (6.4)<br>224 (89.2)                             | 63.6 (40.7-99.5) | 63.6 (40.7-99.5) | 3.4 (1.19-9.71)     | 0.0222           | 0.54 (0.47-0.61)          |                       | 81.8 (61.9-100)  | 71.6 (48.8-100)  | 2.92 (0.88-9.75)  | 0.0813              | 0.55 (0.47-0.62) |                             |           | 63.6 (40.7-99.5) | 63.6 (40.7-99.5) | 2.92 (0.88-9.75)   | 0.0813              | 0.55 (0.47-0.62) | -24.4 (-56.8-8)           | 0.1397    |  |  |
| Very-High-Risk 0-25%                            |                        |                                                                | 87.5 (72.7-100)  | 87.5 (72.7-100)  | 0.94 (0.22-3.96)    | 0.9368           |                           |                       | 87.5 (72.7-100)  | 87.5 (72.7-100)  | 1.27 (0.3-5.39)   | 0.7462              |                  |                             |           | 87.5 (72.7-100)  | 87.5 (72.7-100)  | 1.27 (0.3-5.39)    | 0.7462              |                  | 2.3 (-16.8-21.4)          | 0.8140    |  |  |
| Very-High-Risk 25-100%                          |                        |                                                                | 88.8 (84.6-93.2) | 86.8 (82.2-91.6) | 1.0 (reference)     |                  |                           |                       | 94.5 (91.5-97.6) | 92.1 (88.6-95.8) | 1.0 (reference)   |                     |                  |                             |           | 88.4 (84.2-92.9) | 86.4 (81.8-91.2) | 1.0 (reference)    |                     |                  | 0.0 (reference)           |           |  |  |
| Low-Risk                                        |                        |                                                                |                  |                  |                     |                  |                           |                       |                  |                  |                   |                     |                  |                             |           |                  |                  |                    |                     |                  |                           |           |  |  |
| STAGE-II High Risk (T4 or VELIPi+) and IS       |                        | 77 (30.7)<br>108 (43)<br>66 (26.3)                             | 78.6 (69.9-88.5) | 75.8 (66.6-86.2) | 1.79 (0.75-4.28)    | 0.1918           | 0.63 (0.54-0.72)          |                       | 89.6 (83-96.7)   | 84.2 (76.4-92.8) | 2.16 (0.77-6.06)  | 0.1438              | 0.58 (0.48-0.69) |                             |           | 78.6 (69.9-88.5) | 75.8 (66.6-86.2) | 2.16 (0.77-6.06)   | 0.1438              | 0.58 (0.48-0.69) | -12.5 (-32.7-7.7)         | 0.2256    |  |  |
| High-Risk 0-25%                                 |                        |                                                                | 93.5 (88.9-98.3) | 91.5 (86.4-97)   | 0.98 (0.22-1.56)    | 0.2831           |                           |                       | 95.3 (91.4-99.4) | 94.4 (90.1-98.9) | 1.17 (0.4-3.44)   | 0.7706              |                  |                             |           | 93.5 (88.9-98.3) | 91.5 (86.4-97)   | 1.17 (0.4-3.44)    | 0.7706              |                  | 7.6 (-9.2-24.4)           | 0.3761    |  |  |
| High-Risk 25-100%                               |                        |                                                                | 88.6 (80.4-97.6) | 88.6 (80.4-97.6) | 1.0 (reference)     |                  |                           |                       | 95.2 (90.1-100)  | 93.5 (87.5-99.9) | 1.0 (reference)   |                     |                  |                             |           | 87 (78.5-96.5)   | 87 (78.5-96.5)   | 1.0 (reference)    |                     |                  | 0.0 (reference)           |           |  |  |
| Low-Risk                                        |                        |                                                                |                  |                  |                     |                  |                           |                       |                  |                  |                   |                     |                  |                             |           |                  |                  |                    |                     |                  |                           |           |  |  |
| STAGE II Very High Risk (T4 and VELIPi+)        |                        |                                                                |                  |                  |                     |                  |                           |                       |                  |                  |                   |                     |                  |                             |           |                  |                  |                    |                     |                  |                           |           |  |  |
| Immunoscore Lo vs Int+Hi                        |                        | 11 (40.7)<br>16 (59.3)                                         | 63.6 (40.7-99.5) | 63.6 (40.7-99.5) | 3.17 (0.58-17.33)   | 0.1828           | 0.64 (0.44-0.84)          |                       | 81.8 (61.9-100)  | 71.6 (48.8-100)  | 2.16 (0.36-12.97) | 0.3990              | 0.58 (0.35-0.81) |                             |           | 63.6 (40.7-99.5) | 63.6 (40.7-99.5) | 3.17 (0.58-17.33)  | 0.1828              | 0.64 (0.44-0.84) | -26.7 (-63.6-10.2)        | 0.1560    |  |  |
| Lo (0-25%)                                      |                        |                                                                | 87.5 (72.7-100)  | 87.5 (72.7-100)  | 1.0 (reference)     |                  |                           |                       | 87.5 (72.7-100)  | 87.5 (72.7-100)  | 1.0 (reference)   |                     |                  |                             |           | 87.5 (72.7-100)  | 87.5 (72.7-100)  | 1.0 (reference)    |                     |                  | 0.0 (reference)           |           |  |  |
| Int+Hi (25-100%)                                |                        |                                                                |                  |                  |                     |                  |                           |                       |                  |                  |                   |                     |                  |                             |           |                  |                  |                    |                     |                  |                           |           |  |  |
| STAGE II Low Risk (not (T4 and VELIPi+))        |                        |                                                                |                  |                  |                     |                  |                           |                       |                  |                  |                   |                     |                  |                             |           |                  |                  |                    |                     |                  |                           |           |  |  |
| Immunoscore Lo vs Int+Hi                        |                        | 91 (40.6)<br>133 (59.4)                                        | 82.6 (75-91)     | 80.2 (72.2-89.1) | 2.62 (1.21-5.68)    | 0.0146           | 0.61 (0.52-0.71)          |                       | 92.2 (86.9-97.9) | 87.7 (81.2-94.8) | 1.56 (0.69-3.54)  | 0.2859              | 0.57 (0.46-0.67) |                             |           | 82.6 (75-91)     | 80.2 (72.2-89.1) | 1.88 (0.96-3.7)    | 0.0676              | 0.58 (0.5-0.67)  | -14.4 (-30.2-             |           |  |  |

| Table S4: Multivariable analysis IS vs clinical parameters for TTR, OS and DFS in Stage I-III |                                          |                      |                     |                                       |                      |                     |                                       |                      |                     |
|-----------------------------------------------------------------------------------------------|------------------------------------------|----------------------|---------------------|---------------------------------------|----------------------|---------------------|---------------------------------------|----------------------|---------------------|
|                                                                                               | TTR Model (40/266)*                      |                      |                     | OS Model (32/266)*                    |                      |                     | DFS Model (46/266)*                   |                      |                     |
|                                                                                               | Hazard Ratio<br>(95% CI)                 | P-value <sup>1</sup> | C-Index<br>(95% CI) | Hazard Ratio<br>(95% CI)              | P-value <sup>1</sup> | C-Index<br>(95% CI) | Hazard Ratio<br>(95% CI)              | P-value <sup>1</sup> | C-Index<br>(95% CI) |
| Multivariable Stratified Cox Model                                                            |                                          |                      | 0,75<br>(0.68-0.81) |                                       |                      | 0,76<br>(0.69-0.83) |                                       |                      | 0,74<br>(0.67-0.81) |
| Immunoscore<br>Lo vs Int+Hi                                                                   | 2.22 (1.10-4.55)                         | 0,0269               |                     | 2.44 (1.01-5.55)                      | 0,0304               |                     | 1.89 (1.00-3.57)                      | 0,0516               |                     |
| Age at surgery<br>continuous                                                                  | 1.02 (0.98-1.05)                         | 0,3567               |                     | 1.04 (1-1.08)                         | 0,0659               |                     | 1.03 (0.99-1.06)                      | 0,0967               |                     |
| Gender<br>Female vs Male                                                                      | 1.08 (0.56-2.07)                         | 0,8273               |                     | 0.85 (0.41-1.77)                      | 0,6695               |                     | 1.06 (0.57-1.97)                      | 0,8577               |                     |
| T Stage<br>T3 vs T1-2<br>T4 vs T1-2                                                           | 9.43 (1.26-70.64)<br>14.35 (1.73-119.27) | 0,0289<br>0,0137     |                     | 6.91 (0.91-52.6)<br>11.03 (1.28-95.1) | 0,0618<br>0,0289     |                     | 5.67 (1.33-24.21)<br>7.92 (1.6-39.16) | 0,0191<br>0,0111     |                     |
| N Stage<br>N1 vs N0<br>N2 vs N0                                                               | 0.64 (0.25-1.64)<br>2.35 (1.13-4.89)     | 0,355<br>0,0223      |                     | 0.78 (0.28-2.14)<br>1.81 (0.72-4.59)  | 0,6240<br>0,2082     |                     | 0.62 (0.25-1.56)<br>2.53 (1.24-5.15)  | 0,3113<br>0,0105     |                     |
| Sidedness<br>Distal vs proximal                                                               | 0.97 (0.49-1.93)                         | 0,9307               |                     | 0.98 (0.44-2.19)                      | 0,9689               |                     | 1.1 (0.57-2.12)                       | 0,7789               |                     |
| MSI Status (Derived)<br>dMMR vs pMMR                                                          | 1.08 (0.24-4.81)                         | 0,9177               |                     | 2.9 (0.9-9.33)                        | 0,0742               |                     | 1.8 (0.59-5.43)                       | 0,2994               |                     |

\* (Events/Total): <sup>1</sup>Stratified covariate Wald p-value: Stratified by center. MSS: proficient Mismatch repair (pMMR)

\* (Events/Total); <sup>1</sup>Stratified covariate Wald p-value; Stratified by center. MSS: proficient Mismatch repair (pMMR)

| Section & Topic          | No Item | details                                                                                                                                                | Checklist                                                                                                                                                                                                                                                                                                                                                                                                             |
|--------------------------|---------|--------------------------------------------------------------------------------------------------------------------------------------------------------|-----------------------------------------------------------------------------------------------------------------------------------------------------------------------------------------------------------------------------------------------------------------------------------------------------------------------------------------------------------------------------------------------------------------------|
| <b>TITLE OR ABSTRACT</b> | 1       | Identification as a study of diagnostic accuracy using at least one measure of accuracy                                                                | Yes                                                                                                                                                                                                                                                                                                                                                                                                                   |
| <b>ABSTRACT</b>          | 2       | Structured summary of study design, methods, results, and conclusions (for specific guidance, see STARD for Abstracts)                                 | Yes                                                                                                                                                                                                                                                                                                                                                                                                                   |
| <b>INTRODUCTION</b>      | 3       | Scientific and clinical background, including the intended use and clinical role of the index test                                                     | Yes (novel TNM-Immune classification for Stage I/III colon cancer)                                                                                                                                                                                                                                                                                                                                                    |
|                          | 4       | Study objectives and hypotheses                                                                                                                        | Yes                                                                                                                                                                                                                                                                                                                                                                                                                   |
| <b>METHODS</b>           |         |                                                                                                                                                        |                                                                                                                                                                                                                                                                                                                                                                                                                       |
| <b>Study design</b>      | 5       | Whether data collection was planned before the index test and reference standard were performed (prospective study) or after (retrospective study)     | Yes, Retrospective study using pre-defined test and scoring method and cutoff, on 3 independent datasets                                                                                                                                                                                                                                                                                                              |
| <b>Participants</b>      | 6       | Eligibility criteria                                                                                                                                   | Yes, (Inclusions: Patient with colon cancer ; Age > 18 years ; Patient had surgery performed prior to 2010. (5 years follow-up is recommended) ; Therapeutic procedures (surgery, radiotherapy, chemotherapy, biotherapy, ...) and follow-up registered; T1, T2, T3, T4 tumors ; All N stages ; pM0 at the time of diagnosis ; Adjuvant chemotherapy is allowed ). (Exclusion: Neo-adjuvant treatment, rectum cancer) |
|                          | 7       | On what basis potentially eligible participants were identified (such as symptoms, results from previous tests, inclusion in registry)                 | Yes, (patients with eligibility criteria from participating centers)                                                                                                                                                                                                                                                                                                                                                  |
|                          | 8       | Where and when potentially eligible participants were identified (setting, location and dates)                                                         | Yes, (from participating centers)                                                                                                                                                                                                                                                                                                                                                                                     |
|                          | 9       | Whether participants formed a consecutive, random or convenience series                                                                                | Yes (patients with eligibility criteria from participating centers, randomly selected with 5 years follow-up)                                                                                                                                                                                                                                                                                                         |
| <b>Test methods</b>      | 10a     | Index test, in sufficient detail to allow replication                                                                                                  | Yes (multiple reproducibility data and details fro replication)                                                                                                                                                                                                                                                                                                                                                       |
|                          | 10b     | Reference standard, in sufficient detail to allow replication                                                                                          | Yes (AJCC/UICC-TNM)                                                                                                                                                                                                                                                                                                                                                                                                   |
|                          | 11      | Rationale for choosing the reference standard (if alternatives exist)                                                                                  | Yes, (meta-analysis for available evidence of the association of immune cell infiltrates with prognosis in various types of cancers)                                                                                                                                                                                                                                                                                  |
|                          | 12a     | Definition of and rationale for test positivity cut-offs or result categories of the index test, distinguishing pre-specified from exploratory         | Yes, (Test method was pre-defined, cutoff were defined in the Training set, and subsequently validated in the independent datasets)                                                                                                                                                                                                                                                                                   |
|                          | 12b     | Definition of and rationale for test positivity cut-offs or result categories of the reference standard, distinguishing pre-specified from exploratory | Yes (AJCC/UICC-TNM)                                                                                                                                                                                                                                                                                                                                                                                                   |
|                          | 13a     | Whether clinical information and reference standard results were available to the performers/readers of the index test                                 | Yes, (clinical information, percentiles methods and cutoff of the test are given)                                                                                                                                                                                                                                                                                                                                     |
|                          | 13b     | Whether clinical information and index test results were available to the assessors of the reference standard                                          | Reference (AJCC/UICC-TNM); Test was performed blinded to clinical data and reference standard. Reference standard was done blinded to Test.                                                                                                                                                                                                                                                                           |
| <b>Analysis</b>          | 14      | Methods for estimating or comparing measures of diagnostic accuracy                                                                                    | Yes, (several methods, including Cox multivariate analyses with Logrank P-values, Wald P-values, Chi2 risk contribution, and Harrel's c-index are reported)                                                                                                                                                                                                                                                           |
|                          | 15      | How indeterminate index test or reference standard results were handled                                                                                | Yes, (patients with indeterminate data were excluded from the study)                                                                                                                                                                                                                                                                                                                                                  |
|                          | 16      | How missing data on the index test and reference standard were handled                                                                                 | Yes, (patients with missing data were excluded from the study)                                                                                                                                                                                                                                                                                                                                                        |
|                          | 17      | Any analyses of variability in diagnostic accuracy, distinguishing pre-specified from exploratory                                                      | Yes, (Test was pre-specified, test method was pre-defined, cutoff were defined in the Training set, and subsequently validated in the independent datasets)                                                                                                                                                                                                                                                           |
|                          | 18      | Intended sample size and how it was determined                                                                                                         | Yes (>600 patients in each dataset, and >1200 Stage II, based on HR/P-values from previous studies)                                                                                                                                                                                                                                                                                                                   |
| <b>RESULTS</b>           |         |                                                                                                                                                        |                                                                                                                                                                                                                                                                                                                                                                                                                       |
| <b>Participants</b>      | 19      | Flow of participants, using a diagram                                                                                                                  | Yes (Fig S1)                                                                                                                                                                                                                                                                                                                                                                                                          |
|                          | 20      | Baseline demographic and clinical characteristics of participants                                                                                      | Yes (Table S1)                                                                                                                                                                                                                                                                                                                                                                                                        |
|                          | 21a     | Distribution of severity of disease in those with the target condition                                                                                 | Yes (see appendix tables)                                                                                                                                                                                                                                                                                                                                                                                             |
|                          | 21b     | Distribution of alternative diagnoses in those without the target condition                                                                            | na                                                                                                                                                                                                                                                                                                                                                                                                                    |
|                          | 22      | Time interval and any clinical interventions between index test and reference standard                                                                 | Yes (Standard of care from real-life cancers in each center)                                                                                                                                                                                                                                                                                                                                                          |
| <b>Test results</b>      | 23      | Cross tabulation of the index test results (or their distribution) by the results of the reference standard                                            | Yes (see appendix tables)                                                                                                                                                                                                                                                                                                                                                                                             |
|                          | 24      | Estimates of diagnostic accuracy and their precision (such as 95% confidence intervals)                                                                | Yes (see appendix tables)                                                                                                                                                                                                                                                                                                                                                                                             |
|                          | 25      | Any adverse events from performing the index test or the reference standard                                                                            | na                                                                                                                                                                                                                                                                                                                                                                                                                    |
| <b>DISCUSSION</b>        | 26      | Study limitations, including sources of potential bias, statistical uncertainty, and generalisability                                                  | Yes                                                                                                                                                                                                                                                                                                                                                                                                                   |
|                          | 27      | Implications for practice, including the intended use and clinical role of the index test                                                              | Yes (novel TNM-Immune classification for Stage I/III colon cancer)                                                                                                                                                                                                                                                                                                                                                    |
| <b>OTHER INFORMATION</b> | 28      | Registration number and name of registry                                                                                                               | na                                                                                                                                                                                                                                                                                                                                                                                                                    |
|                          | 29      | Where the full study protocol can be accessed                                                                                                          | Yes                                                                                                                                                                                                                                                                                                                                                                                                                   |
|                          | 30      | Sources of funding and other support; role of funders                                                                                                  | Yes                                                                                                                                                                                                                                                                                                                                                                                                                   |

Table S5: STARD checklist

Forest Plot of Effect of Immunoscore Int+Hi (25-100%) vs Lo (0-25%) on Time To Recurrence (TTR) Stage I-III Patients

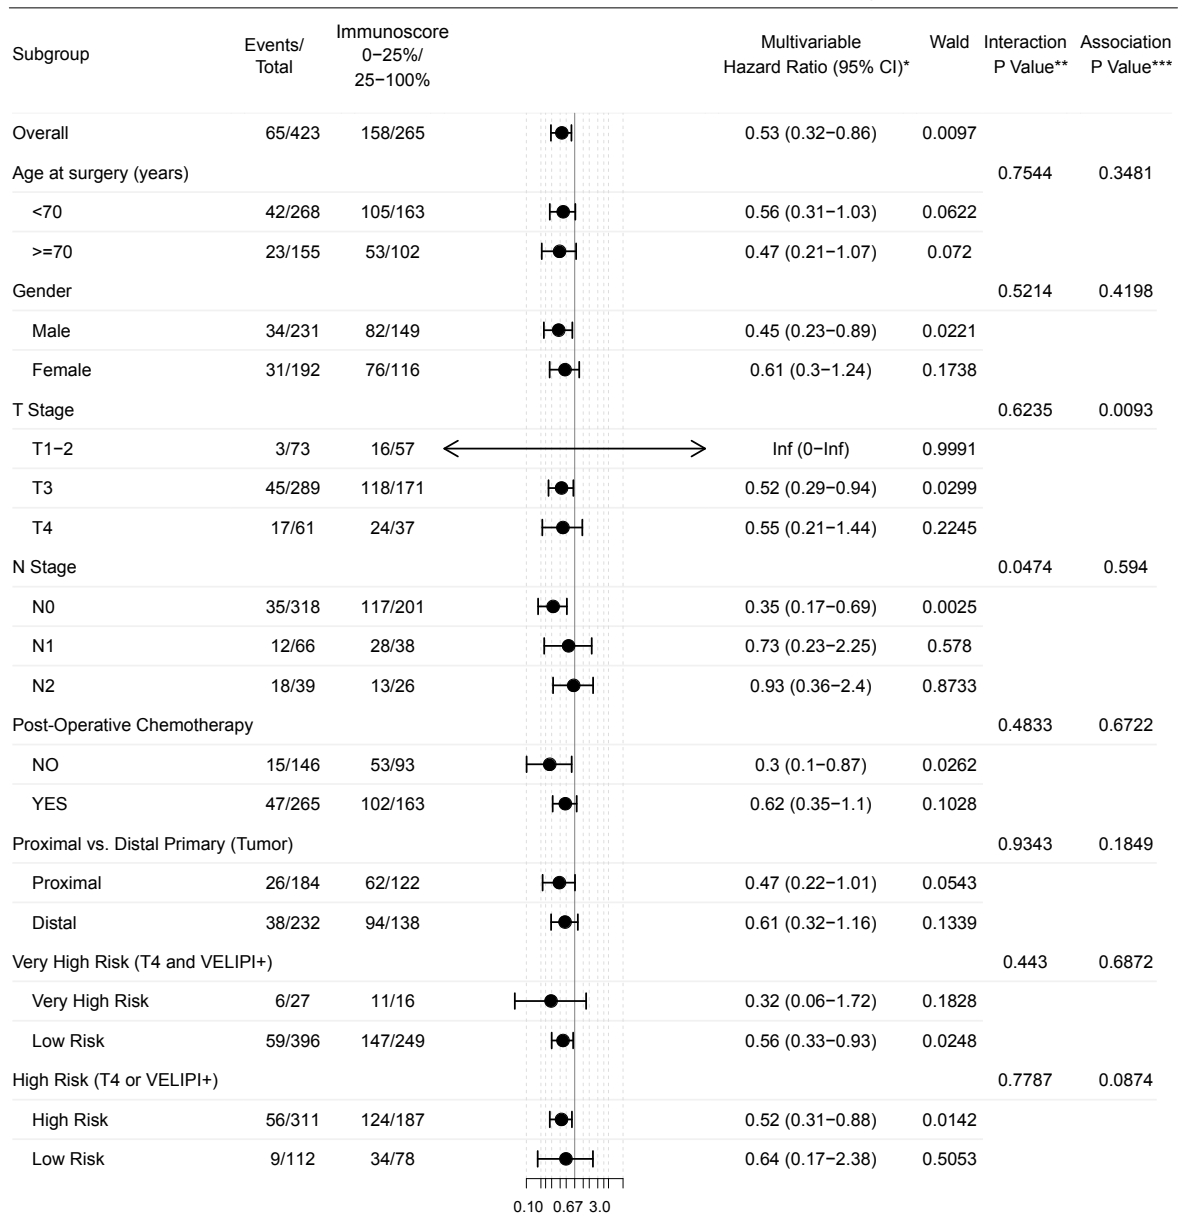

\* Subgroup Analysis for Immunoscore with Lo (0-25%) as ref.  
 \*\* Interaction Wald PValue from interaction term parameter:group.  
 \*\*\*Association PValue from two-sided Fisher's exact test.

Figure S1

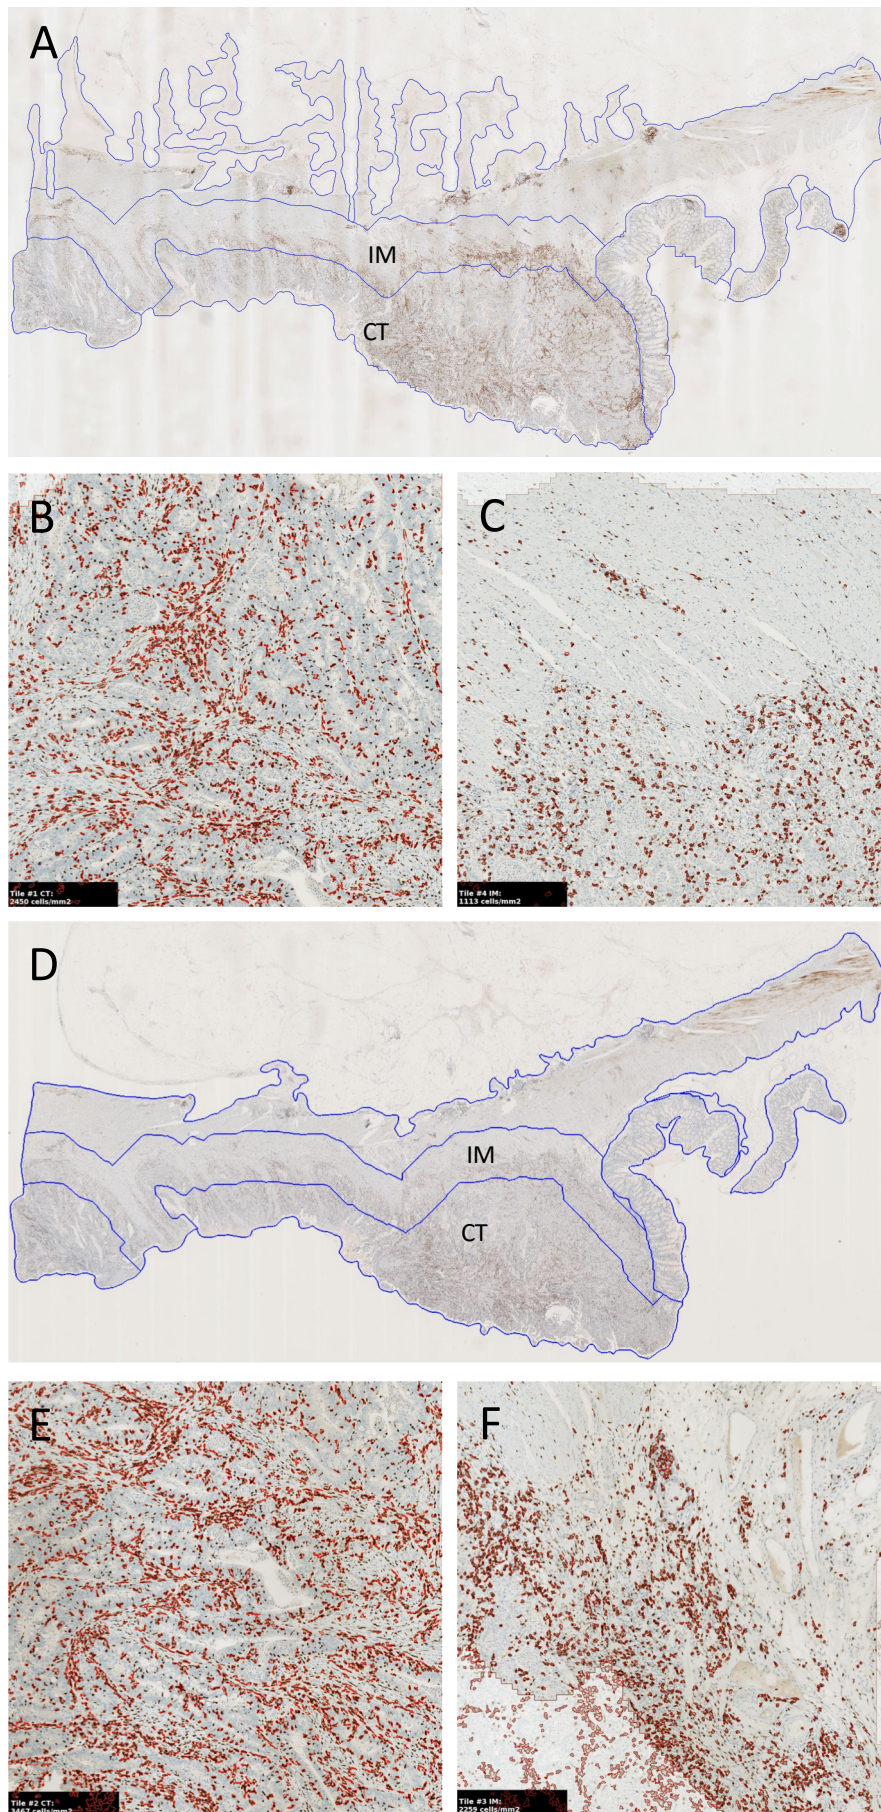

Figure S2: CD8 staining (A, B, C) and CD3 staining (D, E, F) of a patient from Japan, low magnification of the whole slide with CT and IM regions (A, D), and high magnification of CT (B, E) and IM (C, F) regions.

Figure S2
